# Supplementary material for: Nb2Se2C: a new compound as a combination of transition metal dichalcogenide and MXene for oxygen evolution reaction
Source: Royal Society of Chemistry journal article supplement (doi:10.1039/d0cc03282d), 2020-01-01
Supplement: d0cc03282d1.pdf [file d0cc03282d1.pdf]

## SUPPORTING INFORMATION

### **Nb<sub>2</sub>Se<sub>2</sub>C: A New Compound as a Combination of Transition Metal Dichalcogenide and MXene for Oxygen Evolution Reaction**

Xin Pang,<sup>†ab</sup> Tong Wu,<sup>†ab</sup> Yuhao Gu,<sup>†c</sup> Dong Wang,<sup>a</sup> Xiangli Che,<sup>a</sup> Du Sun<sup>a</sup> and Fuqiang Huang<sup>\*ad</sup>

<sup>a</sup>*State Key Laboratory of High Performance Ceramics and Superfine Microstructure, Shanghai Institute of Ceramics, Chinese Academy of Science, Shanghai, 200050, P. R. China. E-mail: [huangfq@mail.sic.ac.cn](mailto:huangfq@mail.sic.ac.cn)*

<sup>b</sup>*University of Chinese Academy of Sciences, Beijing, 100049, P. R. China*

<sup>c</sup>*The Institute of Physics, Chinese Academy of Sciences, Beijing, 100190, P. R. China*

<sup>d</sup>*State Key Laboratory of Rare Earth Materials Chemistry and Applications, College of Chemistry and Molecular Engineering, Peking University, Beijing, 100871, P. R. China*

<sup>†</sup>These authors contributed equally: Xin Pang, Tong Wu and Yuhao Gu.

## Experimental Section

**Preparation of samples.** The powder samples of Nb<sub>2</sub>Se<sub>2</sub>C were synthesized by the traditional high temperature solid-state synthesis method. Starting materials of Nb powder, Se powder, and C powder were mixed stoichiometrically with an excess of C<sub>6</sub>Cl<sub>6</sub> (6 wt%) and ground thoroughly in an agate mortar. The mixture was transferred into a silica tube. After flame sealing under vacuum (<10<sup>-3</sup> torr), the tube was heated to 1473 K at 5 K/min and kept at 1473 K for 2 days and then cool down with the furnace. The synthesis method of NbSe<sub>2</sub> is the same as that of Nb<sub>2</sub>Se<sub>2</sub>C mentioned above, except that the starting materials were replaced by Nb powder (0.315 g) and Se powder (0.185 g), and the temperature procedure was replaced by holding at 1073 K for 1 day. The Nb<sub>2</sub>C samples were purchased from 11 technology Co., Ltd. The NiO (99.9% metals basis, 50 nm) samples were purchased from Aladdin.

**Characterization.** The power X-ray diffraction data (XRD) were collected using a powder diffractometer (Bruker D8 Advance) at room temperature (filtered Cu K $\alpha$  radiation). The patterns were recorded in a slow-scanning mode with  $2\theta$  from 5° to 100° with a scan rate of 1°/min. The transmission electron microscopy (TEM) images were collected on a JEOL-2100F TEM operated at an acceleration voltage of 200 kV. The microtopography and composition of materials were detected by the scanning electron microscopy (SEM, JSM-6510) coupled with energy dispersive X-ray spectroscopy (EDX). The electrical properties of Nb<sub>2</sub>Se<sub>2</sub>C were studied using a Quantum Design Physical Properties Measurement System (PPMS). The resistivity was measured in the temperature range of 2-300 K. The absorption spectrum of the sample was measured on a Hitachi U4100 UV-VIS-NIR spectrometer at room temperature.

**Electrochemical measurement.** The electrochemical measurements were carried out using a CHI760E electrochemistry workstation in a traditional three-electrode cell. The ink was obtained after sonication of ethanol (950  $\mu$ L) with the catalyst (5 mg) and 5 wt% Nafion solution (50  $\mu$ L), and then the dispersion was loaded on the carbon cloth leading to a catalyst loading of  $\approx 2.65$  mg cm<sup>-2</sup>. The ink was dried in air and served as the work electrode. The counter and reference electrodes were carbon rod and Hg/HgO electrode, respectively. The overpotential ( $\eta$ ) was calculated from the formula:  $\eta = E(\text{RHE}) - 1.23$  V, and  $E(\text{RHE}) = E(\text{Hg/HgO}) + 0.059 \times \text{pH} + 0.098$  V in 1.0 M KOH (pH = 13.8). O<sub>2</sub> was poured into the KOH electrolyte for 0.5 h before experiments. O<sub>2</sub>-saturated 1.0 M KOH was used as the electrolyte. Polarization curves were obtained using linear sweep voltammetry (LSV) mode at a scan rate of 5 mV s<sup>-1</sup> in the range of 1.1 to 1.7 V vs. RHE. To estimate the electrochemical active surface area (ECSA) of the catalyst, cyclic voltammogram (CV) was tested to measure the double-layer capacitance (C<sub>dl</sub>) under the potential window of 1.31 to 1.41 V vs. RHE with various scan rates of 20-120 mV s<sup>-1</sup>. Long-term stability tests were performed by chronoamperometric measurement at the overpotential of 350 mV.

**Calculation of electronic structure.** First-principles calculations were performed by using the Projected Augmented Wave Method (PAW)<sup>1</sup> within the density functional theory (DFT) as implemented in the Vienna Ab Initio Simulation Package (VASP)<sup>2</sup> with the experimental structures. The exchange correlation functional was treated within the generalized gradient approximation (GGA) and parameterized in the form of Perdew-Burke-Ernzerhof (PBE) version.<sup>3</sup> The cutoff energy of plane wave basis was set to 600 eV and the energy convergence criterion was 10<sup>-6</sup> eV. The Gamma-centered 16 $\times$ 16 $\times$ 6 k-mesh was used for Brillouin zone (BZ) sampling.

**Calculation of carrier concentration.** The calculation of carrier concentration is implemented by the following formula:

$$\text{slope} = \frac{R_{\text{hall}}}{B} = \frac{W_e}{DqW_s n}$$

**Table S1.** The meaning of symbols in the formula for the calculation of carrier concentration.

---

|                   |                                                     |
|-------------------|-----------------------------------------------------|
| $R_{\text{hall}}$ | the Hall resistance of the sample                   |
| $B$               | the magnetic flux density                           |
| $W_e$             | the distance between electrodes                     |
| $W_s$             | the width of the sample                             |
| $D$               | the height of the sample along the direction of $B$ |
| $q$               | the charge of the carrier                           |
| $n$               | the carrier concentration                           |

---

The slope is  $1.528\text{E-}5 \text{ } \Omega \text{ T}^{-1}$  obtained by the linear fitting of the  $R_{\text{hall}}-B$  curves (**Figure 3d**), and then the carrier concentration is calculated to be  $6.82 \times 10^{16} \text{ m}^{-3}$ .

#### **Accession Codes**

Further details of the crystal structure investigations may be obtained from the Fachinformationszentrum Karlsruhe, 76344 Eggenstein-Leopoldshafen (Germany), on quoting the depository number CSD-1982116.

## Supplementary figures

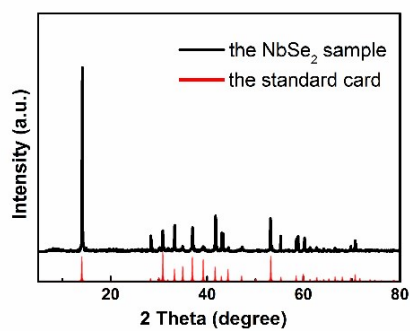

Figure S1. The XRD patterns of the NbSe<sub>2</sub> sample and the standard card (#72-1621).

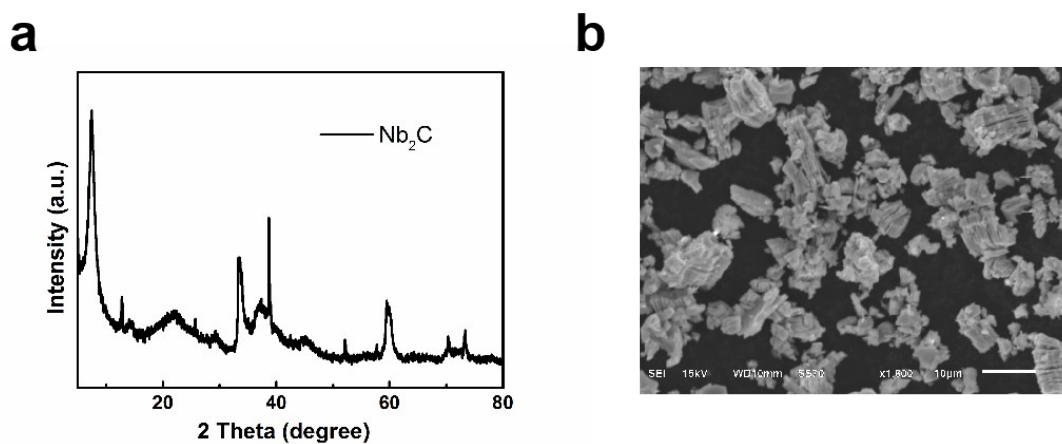

Figure S2. The XRD pattern (a) and the SEM image (b) of the Nb<sub>2</sub>C sample.

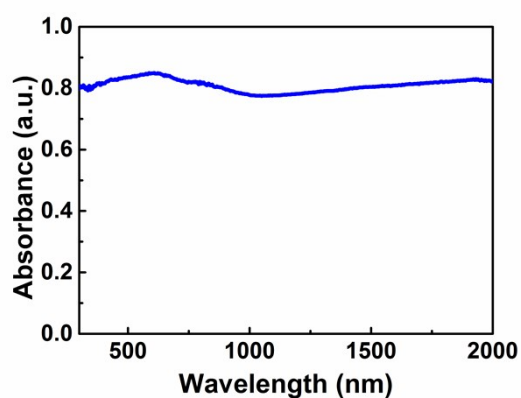

Figure S3. The absorption spectrum of Nb<sub>2</sub>Se<sub>2</sub>C.

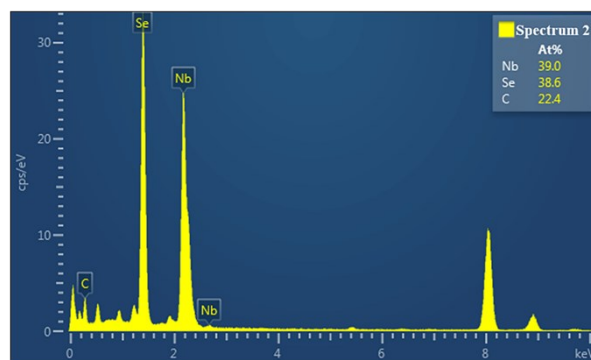

**Figure S4.** Elemental compositions of Nb, Se, and C in  $\text{Nb}_2\text{Se}_2\text{C}$  by EDS. The molar ratio of Nb and Se is close to 1:1.

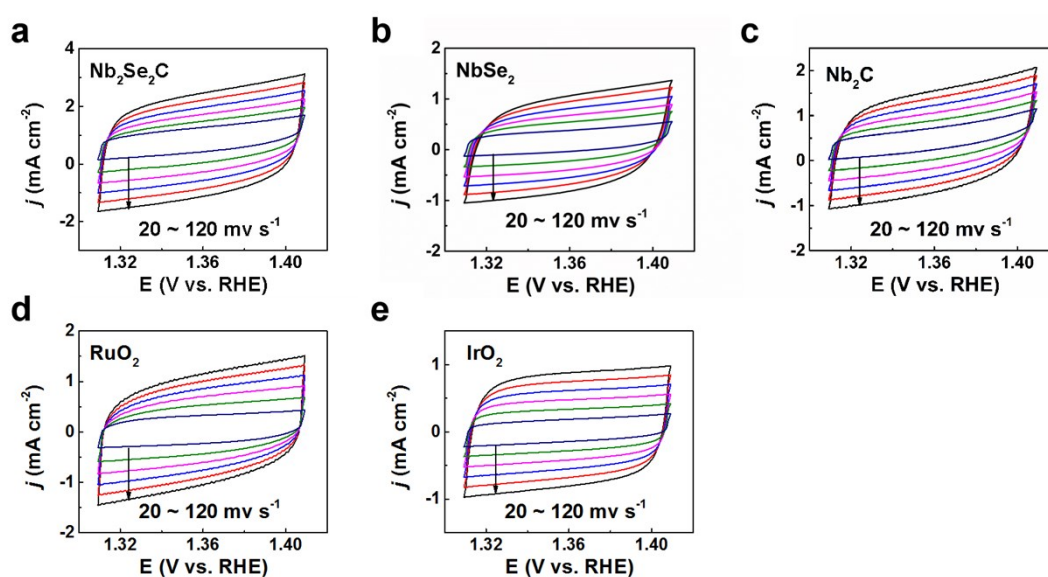

**Figure S5.** Cyclic voltammogram (CV) curves of (a)  $\text{Nb}_2\text{Se}_2\text{C}$ , (b)  $\text{NbSe}_2$ , (c)  $\text{Nb}_2\text{C}$ , (d)  $\text{RuO}_2$ , and (e)  $\text{IrO}_2$  tested under the potential window of 1.31 to 1.41 V vs. RHE with various scan rates from 20 to 120  $\text{mV s}^{-1}$ .

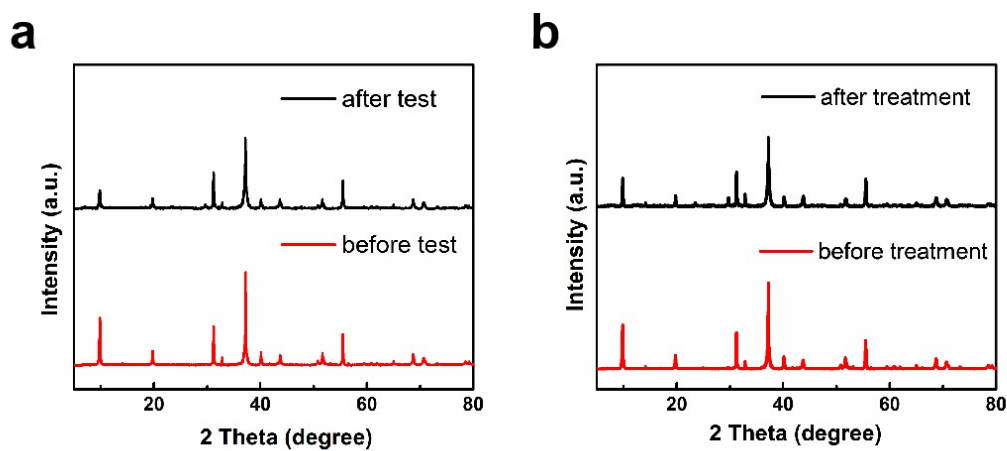

**Figure S6.** (a) The X-ray diffraction patterns of Nb<sub>2</sub>Se<sub>2</sub>C samples before (the red lines) and after (the black lines) the long-term durability test. (b) The X-ray diffraction patterns of Nb<sub>2</sub>Se<sub>2</sub>C samples before (the red lines) and after (the black lines) the heat treatment in air at 573 K for 3 h.

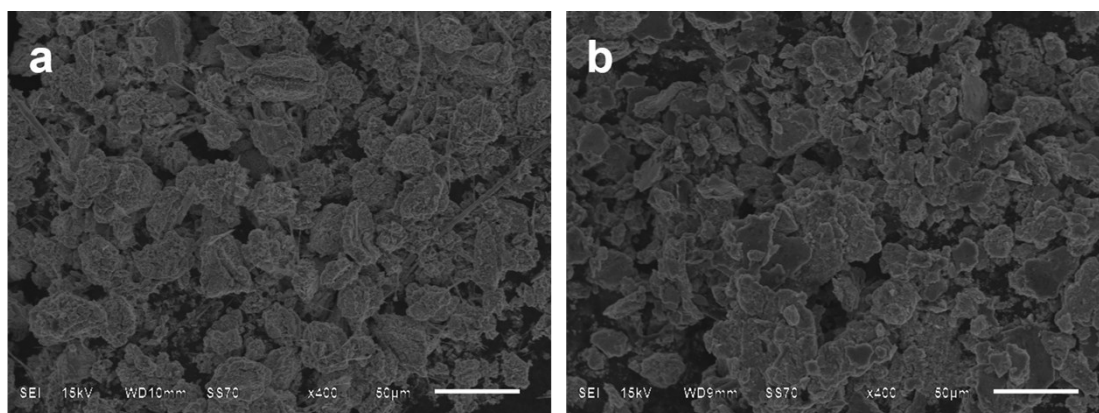

**Figure S7.** The SEM images of Nb<sub>2</sub>Se<sub>2</sub>C samples before (a) and after (b) the long-term durability test.

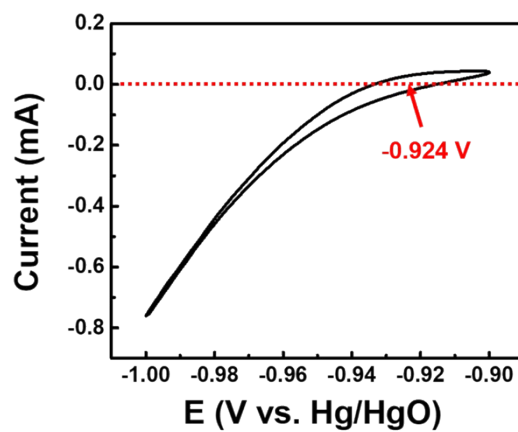

**Figure S8.** The calibration curves for reference electrode in 1 M KOH supporting electrolyte.

## Reference

1. P. E. Blöchl, *Phys. Rev. B*, 1994, **50**, 17953.
2. G. Kresse and J. Furthmüller, *Phys. Rev. B*, 1996, **54**, 11169.
3. J. P. Perdew, K. Burke and M. Ernzerhof, *Phys. Rev. Lett.*, 1996, **77**, 3865.
